# Supplementary material for: Self-assembly of metal–organic frameworks and graphene oxide as precursors for lithium-ion battery applications
Source: Springer Nature journal article supplement (doi:10.1007/s11051-016-3589-5), 2016-10-01
Supplement: MOESM1 [file 10930752]

**Supporting Information**

**Self-assembly of Metal Organic Frameworks and Graphene Oxide as Precursors for Lithium Ion Battery Applications**

Xia Yang,a, b Linlin Liu,b Ruo Yuan*,a Chun-Sing Lee*b

[[1]](#footnote-1)a Key Laboratory of Luminescent and Real-Time Analytical Chemistry, Ministry of Education; College of Chemistry and Chemical Engineering, Southwest University, Chongqing, PR China

b Center of Super-Diamond and Advanced Films (COSDAF) & Dept. of Phys. and Mater. Sci.,City University of Hong Kong, Hong Kong SAR


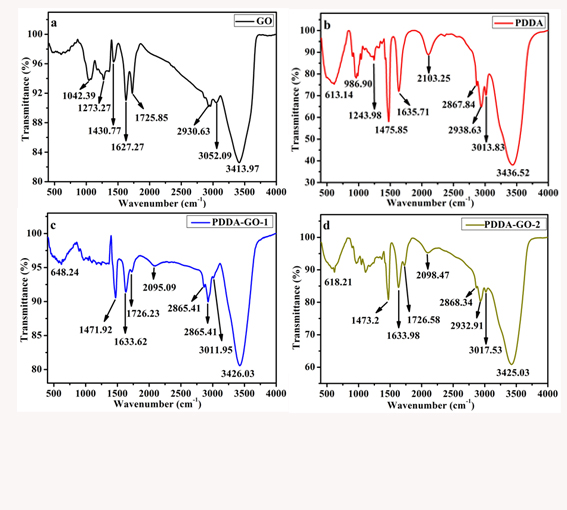


Fig.S1 The FTIR spectra of (a) GO, (b) PDDA, (c) p-GO1 and (d) p-GO2.


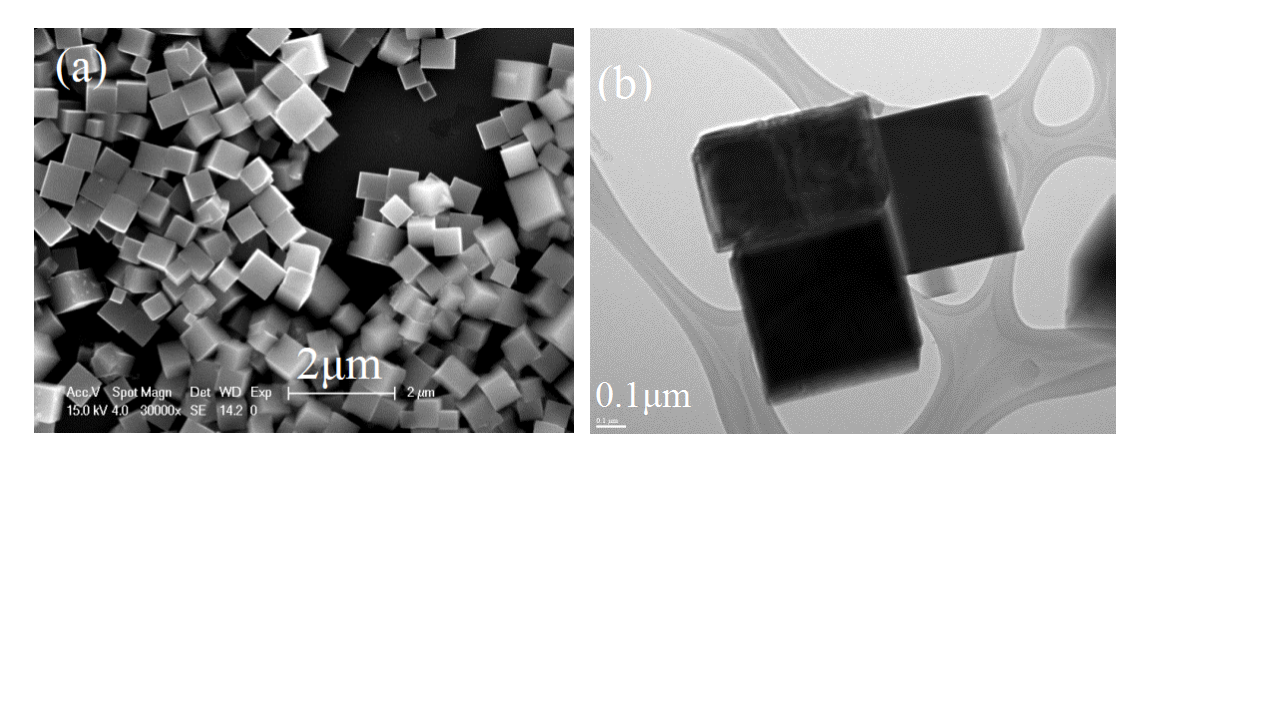


Fig. S2 (a) SEM and (b)TEM images of PB.


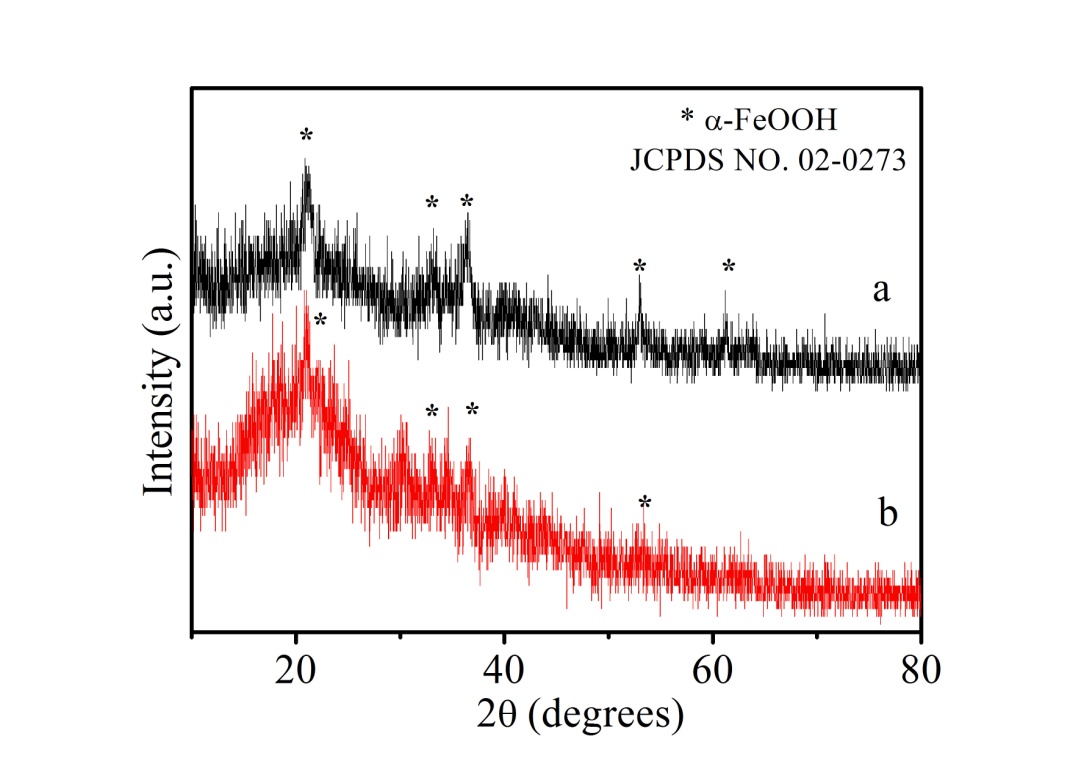


Fig.S3 XRD patterns of proecursors from PB/p-GO1 and PB/p-GO2.


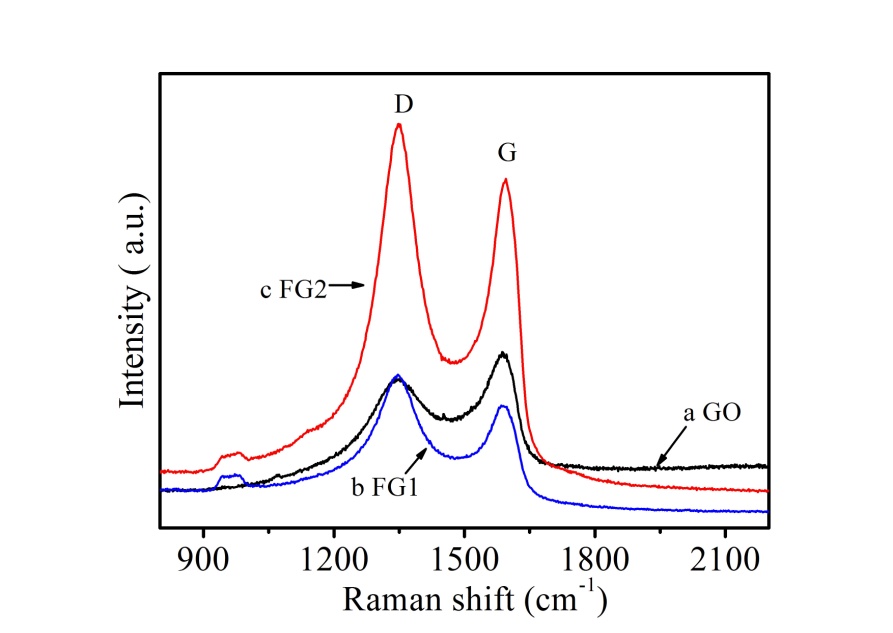


Fig.S4 Raman spectra of (a) GO, (b) FG1 and (c) FG2.


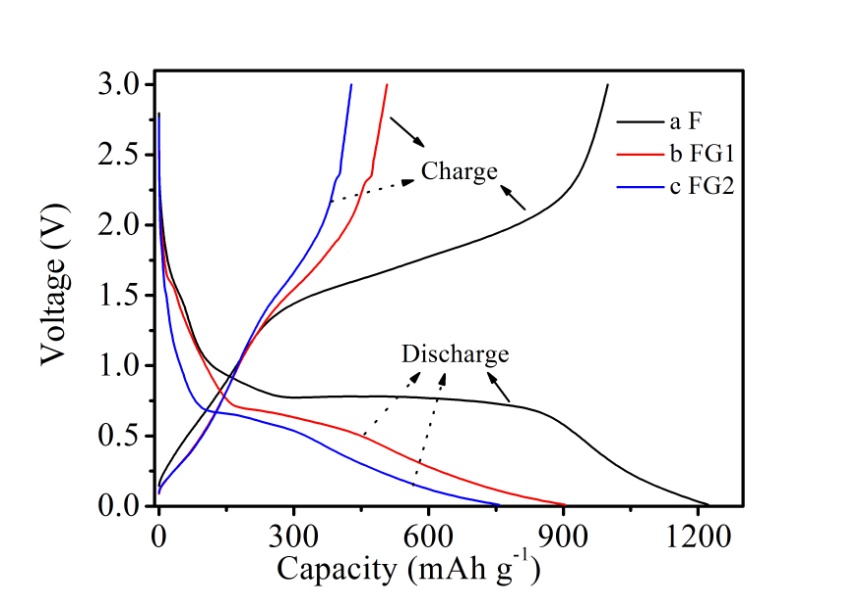


Fig. S5 First discharge-charge curves of (a) F, (b) FG1, (c) FG2.

1. *Corresponding author. Tel.: +852-34427826

   *E-mail address:* yuanruo@swu.edu.cn (R. Yuan); apcslee@cityu.edu.hk (C.-S. Lee ) [↑](#footnote-ref-1)
